# Supplementary material
Source: MDPI journal article supplement (https://www.mdpi.com/1424-8247/14/11/1178)
Supplement: s1 [file s1]

## Supplementary Materials

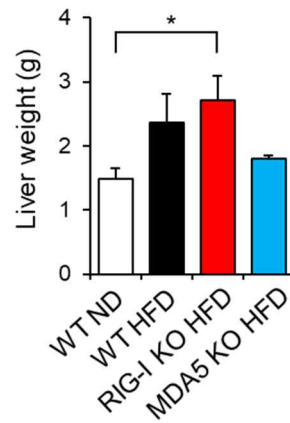

**Figure S1. Liver weights of wild-type (WT), RIG-I knockout (KO), or MDA5 KO mice fed normal diet (ND) or high fat diet (HFD).** Liver weights were measured after 12 weeks of treatment as described in Figure 1. The values in bar graphs represent means  $\pm$  SEM (n=4–5). \*p < 0.05.

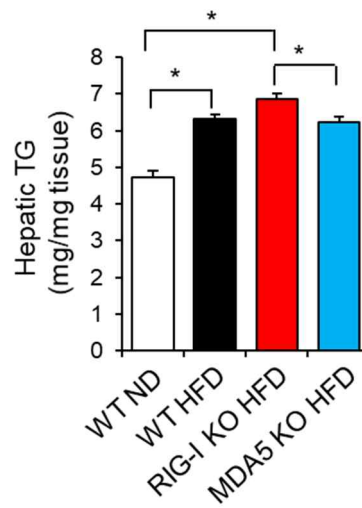

**Figure S2. Hepatic triglyceride (TG) levels of wild-type (WT), RIG-I knockout (KO), or MDA5 KO mice fed normal diet (ND) or high fat diet (HFD).** Liver samples were obtained after 12 weeks of treatment as described in Figure 1. The values in bar graphs represent means  $\pm$  SEM (n=4–5).

\*p < 0.05.

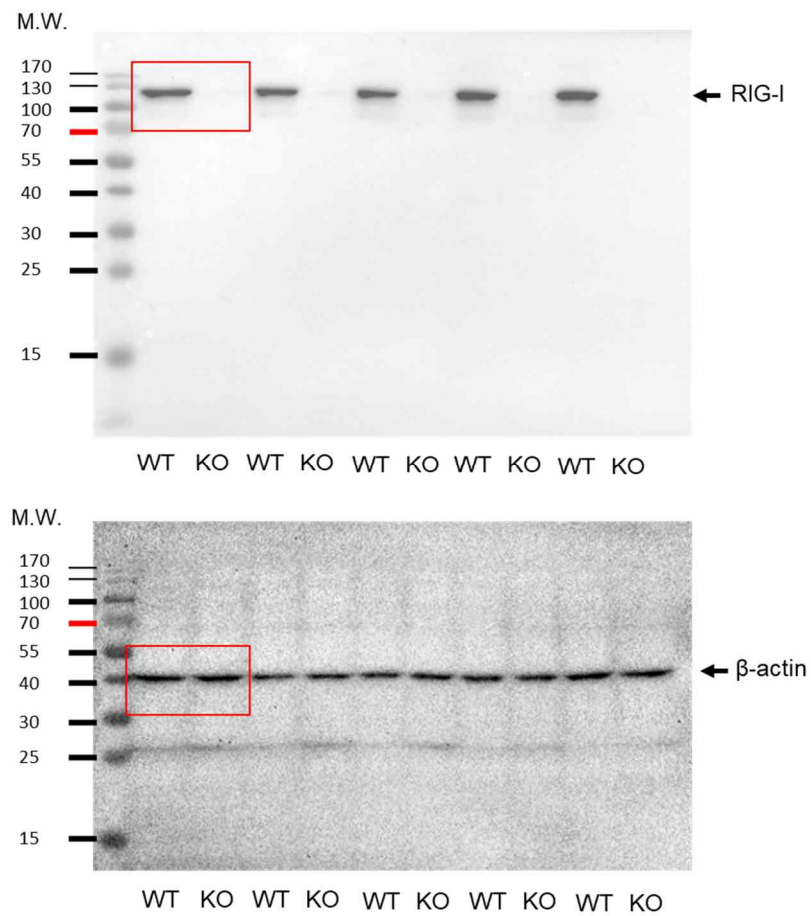

**Figure S3. RIG-I expression in primary hepatocytes isolated from wild-type (WT) or RIG-I-knockout (KO) mice.** Protein expression of RIG-I and  $\beta$ -actin was determined by immunoblotting. The bands in red boxes are presented in Figure 4B.

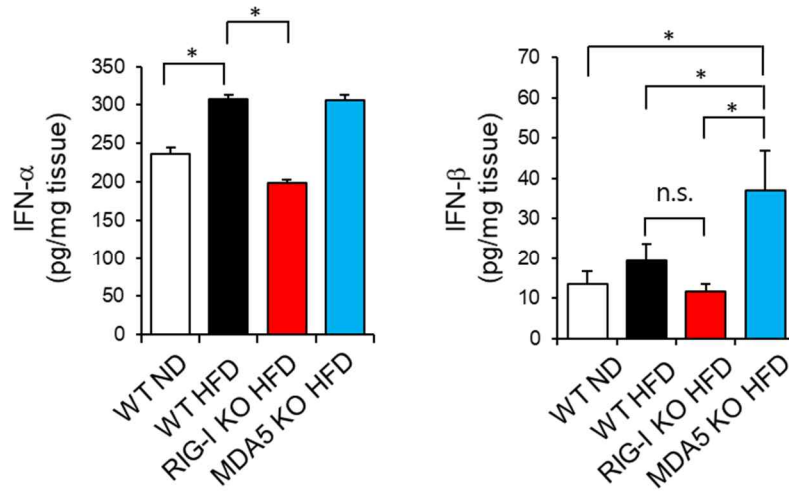

**Figure S4. Hepatic IFN- $\alpha$  and IFN- $\beta$  levels of wild-type (WT), RIG-I knockout (KO), or MDA5 KO mice fed normal diet (ND) or high fat diet (HFD).** Liver samples were obtained after 12 weeks of treatment as described in Figure 1. The levels of IFN- $\alpha$  and IFN- $\beta$  were determined by ELISA. The values in bar graphs represent means  $\pm$  SEM (n=4–5). \*p < 0.05.

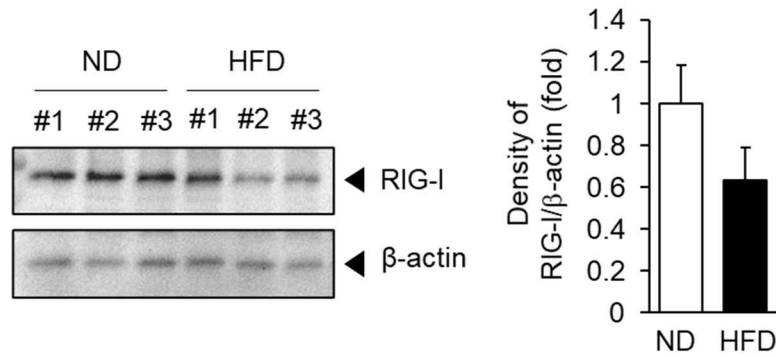

**Figure S5. RIG-I expression in livers isolated from of wild-type mice fed normal diet (ND) or high fat diet (HFD).** Protein expression of RIG-I and  $\beta$ -actin was determined by immunoblotting. The numbers represent individual animals. The graph represents density of RIG-I/ $\beta$ -actin. The values in bar graphs represent means  $\pm$  SEM (n=3).
